# Supplementary material for: Synthesis and photoluminescence modulating of polypyrrole fluorescent nano-spheres/dots
Source: Royal Society of Chemistry journal article supplement (doi:10.1039/c6ra01468b), 2016-01-01
Supplement: c6ra01468b1.pdf [file c6ra01468b1.pdf]

Supporting Information

Synthesis and photoluminescence modulating of polypyrrole fluorescent nano-  
spheres/dots

*Ben Dong, Mei Yang, Shusheng Ge, Yi Cao, Baoyan Li and Yun Lu\**

Department of Polymer Science and Engineering, State Key Laboratory of Coordination Chemistry, Collaborative Innovation Center of Chemistry for Life Sciences, Key Laboratory of High Performance Polymer Materials and Technology (Nanjing University), Ministry of Education, School of Chemistry and Chemical Engineering, Nanjing University, Nanjing 210023, P. R. China

**Cellular toxicity test and cellular imaging** In toxicity test, cells in the exponential growth phase were washed by PBS twice. After digesting by 0.25% trypsin solution for 2 min, cells were suspended by PBS and washed twice. Then whole culture medium was added and cells suspension was transferred to 96-well plate with 200  $\mu\text{L}$  in each well. In control group, 20  $\mu\text{L}$  PBS was added to each well. In experimental group, 20  $\mu\text{L}$  nanodots solution in different concentrations was added to each well. Cells were then cultured at 37  $^{\circ}\text{C}$  under 5%  $\text{CO}_2$  in standard incubator for 12 hours, 24 hours, respectively. Then combined EB/AO staining was executed for cell state examination. 10  $\mu\text{L}$  EB/AO ( $100 \mu\text{g mL}^{-1}$ ) was added to each well. The resulting fluorescence images of the cells were monitored by the Leica DMIRE2 microscope fluorescence analyzing system. Cell viability data was captured by Image-Pro Plus (IPP) program. HeLa cells were cultured and propagated in a cover-glass-bottom dish in DMEM cell culture medium (Gibco) with 10% fetal bovine serum and  $100 \text{ mg L}^{-1}$  penicillin and  $100 \text{ mg L}^{-1}$  streptomycin at 37  $^{\circ}\text{C}$  under 5%  $\text{CO}_2$  in standard incubator. After 12 hours incubation, fresh culture medium with 5% nanodots (The final concentration is about  $100 \mu\text{g mL}^{-1}$ ) was added to the cell culture dishes. Then, the cells were washed with PBS for three times to remove the excess nanodots. Immediately after the incubation and washing steps, the images observation were taken by a confocal laser scanning microscope. The confocal analysis was performed on a ZEISS LSM710 laser scan confocal microscope at an excitation wavelength of 405 nm and emission length of 450 nm.

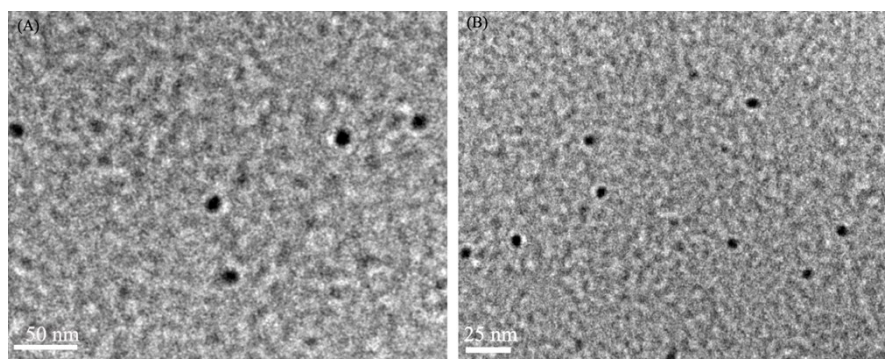

**Figure S1.** PPy nanospheres using THF as solvents.

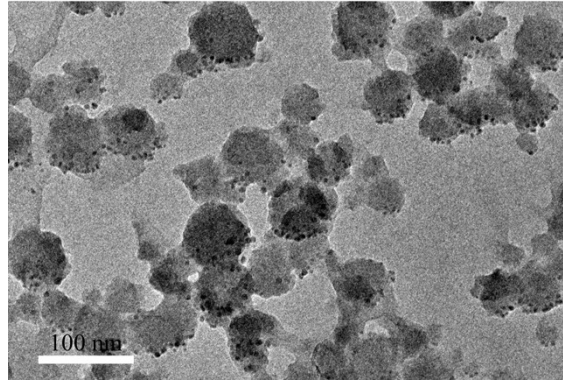

**Figure S2.** Bigger size PPy nanospheres <sup>a</sup>

<sup>a</sup> The supernatant liquors containing PPy nanospheres was placed for several days at static states, the bigger size of PPy nanospheres was gained.

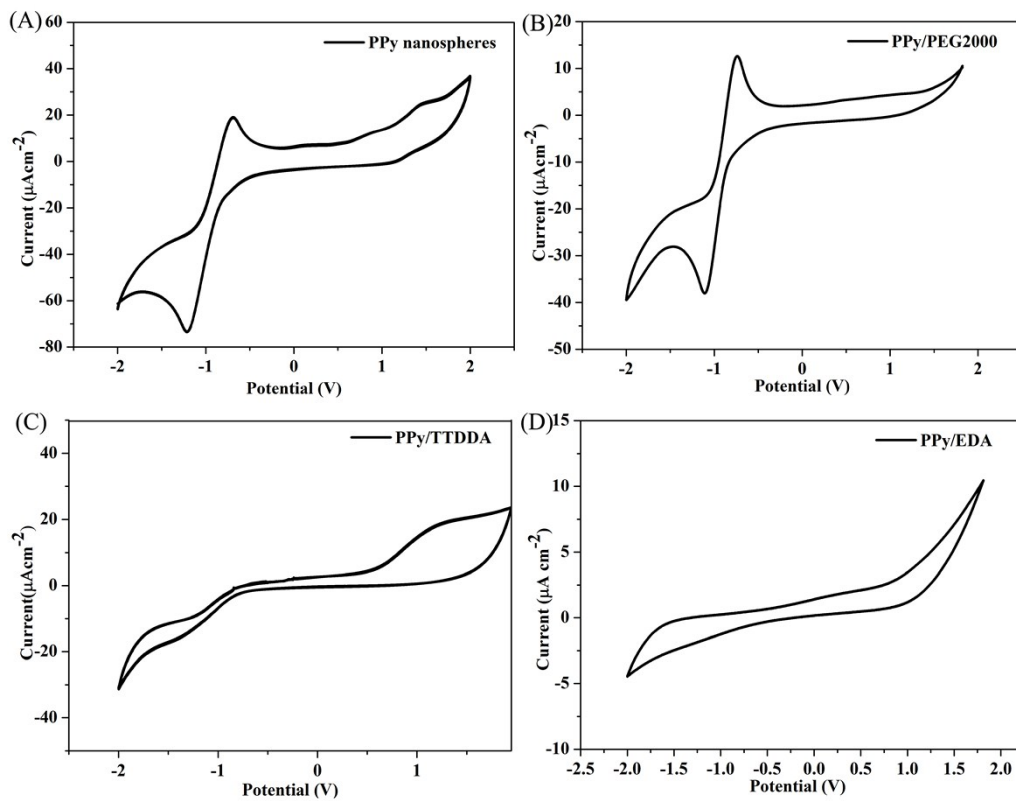

**Figure S3.** CV curve on platinum electrode. (A) PPy nanospheres, (B) PPy/PEG2000, (C) PPy /TTDDA, (D) PPy/EDA.

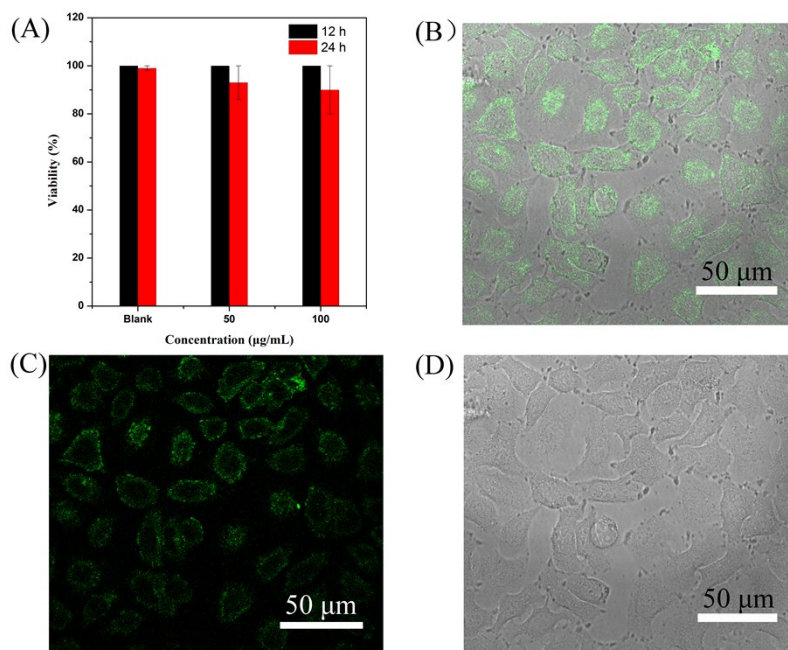

**Figure S4.** Cellular toxicity and cellular imaging of PPy/PEG2000 fluorescent nanodots. (A) Effect of PPy/PEG2000 fluorescent nanodots on HL-60 cell viability. (B-D) Washed cells imaged under bright field, confocal photoluminescent, overlap of corresponding bright field image and fluorescence image.

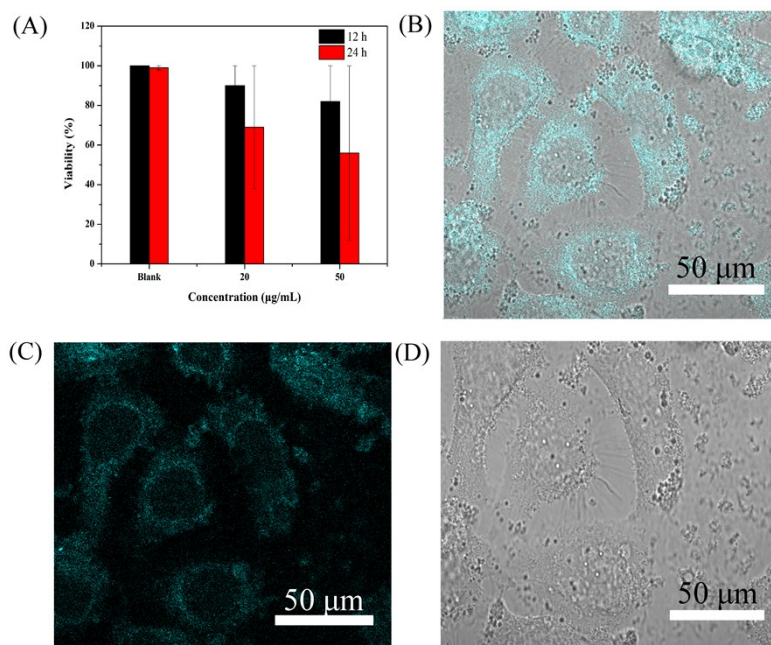

**Figure S5.** Cellular toxicity and cellular imaging of PPy/EDA fluorescent nanospheres. (A) Effect of PPy/EDA fluorescent nanospheres on HL-60 cell viability. (B-D) Washed cells imaged under bright field, confocal photoluminescent, overlap of corresponding bright field image and fluorescence image.

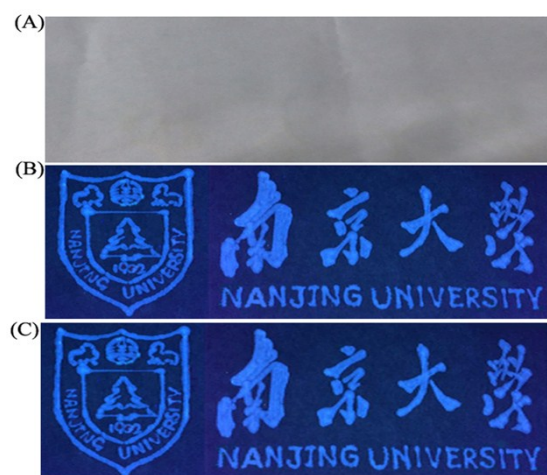

**Figure S6.** Symbols written on paper by using PPy/EDA nanodots fluorescence ink (A) Under natural light, (B) Under UV 365 nm lamp and (C) 2 months latter under UV365 nm lamp.
